# Supplementary material for: EIF4G1 and RAN as Possible Drivers for Malignant Pleural Mesothelioma
Source: MDPI journal article supplement (doi:10.3390/ijms21144856), 2020-07-09
Supplement: s1 [file s1]

**Supplementary Table 1: Overview of the results for the panel of Cancer Driver Genes (CDGs).**

Results of silencing (both mRNA and protein levels) and phenotypic assays (proliferation assay, caspase activation, colony formation “CF” assay, and migration assay) are listed for each CDGs.

Legend: X: experiment not performed; ✓: Experiment successful; ↑: the assay shows an increase in the effect; ↓: the assay shows a decrease in the effect; =: the assay shows no effects. Statistical significance is indicated by asterisk (\*), where \*=P<0.05; \*\*=P<0.01; \*\*\*=P<0.001, compared to control treatment.

| CDGs           | Silencing mRNA/protein | Proliferation | Caspase activation | CF assay | Migration assay |
|----------------|------------------------|---------------|--------------------|----------|-----------------|
| <i>GLUT1</i>   | X                      | X             | X                  | X        | X               |
| <i>SOD1</i>    | X                      | X             | X                  | X        | X               |
| <i>ITGA4</i>   | X                      | X             | X                  | X        | X               |
| <i>ASS1</i>    | ✓                      | ↓ (***)       | =                  | ↓ (**)   | =               |
| <i>EIF4G1</i>  | ✓                      | ↓ (***)       | ↑ (*)              | ↓ (**)   | =               |
| <i>GALNT7</i>  | ✓                      | ↓ (**)        | =                  | ↓ (*)    | =               |
| <i>IGF2BP3</i> | ✓                      | ↓ (***)       | =                  | =        | ↓ (*)           |
| <i>RAN</i>     | ✓                      | ↓ (***)       | ↑ (***)            | ↓ (**)   | =               |
| <i>THBS2</i>   | ✓                      | ↓ (*)         | =                  | ↓ (**)   | =               |
