# Supplementary material for: EIF4G1 and RAN as Possible Drivers for Malignant Pleural Mesothelioma
Source: MDPI journal article supplement (doi:10.3390/ijms21144856), 2020-07-09
Supplement: s1 [file s1]

# ***EIF4G1 and RAN as possible drivers for Malignant Pleural Mesothelioma***

**Irene Dell'Anno<sup>1, ‡</sup>, Marcella Barbarino<sup>2,3, ‡</sup>, Elisa Barone<sup>1, ‡</sup>, Antonio Giordano<sup>2,3</sup>, Luca Luzzi<sup>4</sup>, Maria Bottaro<sup>2</sup>, Loredana Migliore<sup>1</sup>, Silvia Agostini<sup>1</sup>, Alessandra Melani<sup>1</sup>, Ombretta Melaiu<sup>1,5</sup>, Calogerina Catalano<sup>1,6</sup>, Monica Cipollini<sup>1</sup>, Roberto Silvestri<sup>1</sup>, Alda Corrado<sup>1,7</sup>, Federica Gemignani<sup>1,§</sup>, Stefano Landi<sup>1,§</sup>**

\*

<sup>1</sup> Department of Biology, Genetic Unit, University of Pisa, Pisa, Italy; [irene.dellanno@biologia.unipi.it](mailto:irene.dellanno@biologia.unipi.it) (I.D.); [elisa\\_barone@ymail.com](mailto:elisa_barone@ymail.com) (E.B.); [loredana.migliore@student.unipi.it](mailto:loredana.migliore@student.unipi.it) (L.M.); [silvietta.agostini@gmail.com](mailto:silvietta.agostini@gmail.com) (S.A.); [alessandra-29@hotmail.it](mailto:alessandra-29@hotmail.it) (A.M.); [ombretta.melaiu@unipi.it](mailto:ombretta.melaiu@unipi.it) (O.M.); [cal.catalano@gmail.com](mailto:cal.catalano@gmail.com) (C.C.); [monica.cipollini@unipi.it](mailto:monica.cipollini@unipi.it) (M.C.); [r.silvestri17@gmail.com](mailto:r.silvestri17@gmail.com) (R.S.); [corradoalda@gmail.com](mailto:corradoalda@gmail.com) (A.C.); [federica.gemignani@unipi.it](mailto:federica.gemignani@unipi.it) (F.G.).

<sup>2</sup> Department of Medical Biotechnologies, University of Siena, Siena, Italy; [marcella.barbarino@unisi.it](mailto:marcella.barbarino@unisi.it) (M.B.<sup>‡</sup>); [president@shro.org](mailto:president@shro.org) (A.G.); [mariaeusebia.bottaro@gmail.com](mailto:mariaeusebia.bottaro@gmail.com) (M.B.).

<sup>3</sup> Sbarro Institute for Cancer Research and Molecular Medicine, Center for Biotechnology, College of Science and Technology, Temple University, Philadelphia, Pennsylvania.

<sup>4</sup> Department of Medicine, Surgery and Neurosciences, Siena University Hospital, Siena, Italy; [dr.luca.luzzi@gmail.com](mailto:dr.luca.luzzi@gmail.com) (L.L.).

<sup>5</sup> Immuno-Oncology Laboratory, Department of Paediatric Haematology/Oncology and of Cell and Gene Therapy, Ospedale Pediatrico Bambino Gesù, IRCCS, Rome, Italy.

<sup>6</sup> Department of Internal Medicine V, University of Heidelberg, Heidelberg, Germany.

<sup>7</sup> Department of Bioscience, University of Milan, Milan, Italy.

\* Correspondence: Stefano Landi, [stefano.landi@unipi.it](mailto:stefano.landi@unipi.it)

<sup>‡</sup> The authors contributed equally to this work.

<sup>§</sup> The authors contributed equally to this work

## **SUPPLEMENTARY RESULTS**

### **ASS1 Screening.**

Western blots showed that ASS1 had a positive staining, at various extents, in all the cell lines [Fig. S4]. A low expression was observed in MeT-5A. MPM cells showed varied expressions: low (i.e. a relative expression  $\leq 1$ ) in Mero-14 and NCI-H28, high (i.e. a relative expression  $\geq 1$ ) in Mero-25 and IST-Mes2 cells with relative intensities of 3-fold ( $P=0.044$ ) and 2-fold ( $P=0.049$ ), respectively. A similar trend was observed also for ASS1 mRNA, with a low relative expression in Mero-14 and NCI-H28 ( $P<0.001$  for both cells) and a high relative expression in Mero-25 and IST-Mes2 cells (1.50-fold,  $P<0.001$  and 2.3-fold,  $P<0.001$ , respectively) [Fig. S4]. Thus, the phenotypic assays following ASS1 silencing were performed in Mero-25, IST-Mes2, and MeT-5A cell lines. The siRNA targeting ASS1, now on called siASS1-1, was effective at various extents, leading to a residual expression of the mRNA ranging from 0.10X (MeT-5A) to 0.15X (IST-Mes2) as compared to siCTRL [Fig. S5]. The silencing efficiency was measured also at protein level: ASS1 depletion was efficient, at various extents, in all cell lines under examination, with a residual expression ranging from 0.40X (IST-Mes2) to 0.5X (Mero-25) [Fig. S5]. The depletion of ASS1 significantly affected the proliferation of Mero-25 and IST-Mes2 cell lines [Fig. S6]. In Mero-25, proliferation decreased of about 40% at day 6 ( $P<0.001$ ) and of 35% at day 8 after transfection ( $P<0.001$ ). In IST-Mes2 the proliferation was reduced of about 23% at day 6 ( $P<0.001$ ) and at day 8 ( $P<0.001$ ). In MeT-5A, we did not observe any statistically significant difference following the transfection with siCTRL or siASS1-1 [Fig. S6]. Moreover, Mero-25 and IST-Mes2 cell lines showed a decreased ability in colony formation [Fig. S7] with an average decrease in the number of colonies of about 25% ( $P=0.0071$ ) and 30% ( $P=0.0061$ ), respectively. No effects were seen in MeT-5A cell line. ASS1 silencing induced a slight increase of caspases activities, although not statistically significant, in the order of 1.3- and 1.2- fold for Mero-25 ( $P=0.21$ ) and IST-Mes2 ( $P=0.42$ ), respectively [Fig. S8]. MeT-5A did not show

any changes after *ASS1* silencing, in comparison to siCTRL treatment [Fig. S8]. Finally, we did not observe any relevant and significant difference in migration ability after *ASS1* silencing in any of the cell lines under treatment [data not shown for brevity].

### ***EIF4G1* Screening.**

All the analysed cell lines showed a positive staining of *EIF4G1* in the western blots. The relative expression of Mero-14 and IST-Mes2 was higher, close to the statistical significance, to the reference (respectively: 1.4-fold,  $P=0.08$  and 1.7-fold,  $P=0.06$ ) whereas the other MPM cell lines showed similar levels [Fig. 1A-B]. The results of RT-qPCR showed that MeT-5A, Mero-25, and NCI-H28 had similar levels of expression [Fig. 1C], whereas IST-Mes2 and Mero-14 had the highest expression (about 2-fold for both, compared to MeT-5A,  $P<0.001$  and  $P=0.0045$ , respectively). Thus, MeT-5A, Mero-14, and IST-Mes2 were further evaluated following *EIF4G1* gene silencing. The siRNA, now on named siEIF4G1-1, was effective both at mRNA and protein level in all cell lines [Fig. 1]. The residual expression of *EIF4G1* mRNA ranged from 0.10X (IST-Mes2,  $P<0.001$ ) to 0.30X (Mero-14 and MeT-5A,  $P<0.001$  for both) as compared to siCTRL. At protein level, the residual expression ranged from  $<0.1X$  (MeT-5A,  $P=0.0033$ ) to 0.46X (Mero-14,  $P=0.055$ ) [Fig. 1D-E]. Compared to siCTRL, the treatment with siEIF4G1-1 induced a reduction (about -75%) of the proliferation rate in IST-Mes2 cells ( $P<0.001$ ) [Fig. 2], that was not observed in MeT-5A or in Mero-14 cells. Overall, clonogenic assay showed a decreased colony formation ability, fourteen days after *EIF4G1* silencing, in all malignant cell lines but not in MeT-5A cells [Fig. 3]. The number of colonies were reduced of about 18% in Mero-14 ( $P=0.0088$ ) and of 32% in IST-Mes2 ( $P=0.022$ ) cells, as compared to siCTRL. MeT-5A cell line did not show any effect following siEIF4G1-1 treatment. *EIF4G1* depletion caused an increase in caspases 3 and 7 activity in all the cell lines, ranging from about 1.4X (IST-Mes2) to 1.6X (Mero-14), statistically significant at the level of 0.05

(with the exception of IST-Mes2 cells) when compared to siCTRL [Fig. 4]. The wound healing assay showed no effects [data not reported for brevity].

### ***GALNT7* Screening.**

The expression of *GALNT7* was highly variable also within the same cell lines and the replicates of the western blots showed variable intensities. On the average, an abundant relative expression of *GALNT7* was observed for Mero-14 and IST-Mes2 (about 6.5X for both, compared to MeT-5A) [Fig. S9]. The mRNA analysis showed the same pattern of expression [Fig. S9]. We used si*GALNT7*-1 in MeT-5A, Mero-14, and IST-Mes2 cells si*GALNT7*-1 acted efficiently, since *GALNT7* mRNA and protein levels were strongly reduced in all cell lines, with a residual expression ranging from 0.10X (IST-Mes2,  $P<0.001$ ) to 0.30X (Mero-14,  $P<0.001$ ) for mRNA and from about 0.10X (IST-Mes2,  $P=0.013$ ) to 0.20X (MeT-5A,  $P<0.05$ ) for the protein [Fig. S10]. *GALNT7* silencing slightly impaired the proliferation of MPM cell lines [Fig.S11]. We observed a decrease of about 30% in Mero-14 ( $P=0.085$ ) and 20% in IST-Mes2 ( $P=0.0035$ ), eight days after si*GALNT7*-1 treatment, whereas no significant effects were recorded in MeT-5A [Fig. S11]. *GALNT7* did not affect the clonogenic ability of MeT-5A and Mero-14 cells, whereas a reduction was shown in IST-Mes2 cells with a decrease of about 40% in colonies number ( $P<0.05$ , Fig. S12). No significant changes were induced by si*GALNT7*-1 in the caspases' activity: we only observed, approximately, a slight decrease, up to 30%, statistically not-significant, in MeT-5A and in Mero-14, compared to siCTRL [data not shown for brevity]. We did not record any significant effect on the migration abilities of the tested cells after *GALNT7* silencing [data not shown for brevity].

### ***IGF2BP3* Screening.**

Two MPM cell lines, Mero-14 and IST-Mes2, showed a statistically significant up-regulated relative expression of IGF2BP3 protein (Mero-14,  $P=0.0093$ ; IST-Mes2,  $P=0.039$ ) [Fig. S13]. These findings were also confirmed at mRNA level, with high levels of *IGF2BP3* in Mero-14 ( $P=0.026$ ) and in IST-

Mes2 ( $P=0.0052$ ) versus MeT-5A [Fig. S13]. Thus, gene silencing was carried out in MeT-5A, Mero-14, and IST-Mes2. The siRNA, now on called siIGF2BP3-1, was effective at mRNA level for all the cell lines, at various extents, ranging from 0.12X (Mero-14,  $P<0.001$ ) to 0.60X (MeT-5A,  $P=0.0025$ ) as compared to the siCTRL [Fig. S14]. The western blots showed the same pattern, with a residual expression ranging from 0.5X (IST-Mes2,  $P=0.0013$ ) to 0.7X (MeT-5A,  $P=0.07$ ) [Fig. S14]. In spite the low reduction of IGF2BP3 protein after gene silencing in MeT-5A (likely because the low basal expression), we proceed anyway with the phenotypic study in the three cell lines. *IGF2BP3* silencing reduced the growth of Mero-14 cells, starting from day 4, reaching a maximum reduction of 54.58% at day 8 ( $P<0.001$ ). In MeT-5A and IST-Mes2, the proliferation was not affected significantly compared to siCTRL treatment [Fig. S15]. The clonogenic ability was not affected by the treatment with siIGF2BP3-1 [data not shown for brevity], whereas caspase -3 and -7 activities showed an increase of about 20-40% in the three cell lines, not statistically significant [Fig. S16]. Similarly, lack of effects was recorded in the wound healing assay for MeT-5A and IST-Mes2. Mero-14 cells showed a decreased migration ability following siIGF2BP3-1 treatment, of about 25% ( $P=0.035$ ) [Fig. S17].

### **RAN Screening.**

The protein RAN showed an elevated relative expression in all MPM cell lines [Fig. 5]. The measured intensities were 1.5-fold in Mero-14 ( $P=0.13$ ), 1.75-fold in Mero-25 ( $P=0.011$ ), 1.70-fold in IST-Mes2 ( $P=0.068$ ) and 2.2-fold in NCI-H28 ( $P=0.024$ ). The mRNA analysis confirmed this pattern for Mero-14 ( $P<0.001$ ), Mero-25 ( $P=0.048$ ) and IST-Mes2 ( $P<0.001$ ), but not for NCI-H28, where mRNA basal levels of *RAN* resulted downregulated of 0.40-fold versus MeT-5A ( $P<0.001$ ) [Fig. 5A-C]. However, we silenced *RAN* in MeT-5A and all the MPM cells. The siRNA, now on called siRAN-1, worked efficiently, at various extents, in four cell lines with a residual expression, of the mRNA, ranging from 0.1X (Mero-14,  $P<0.001$ ) to 0.50X (NCI-H28,  $P=0.031$ ) as compared to siCTRL

[Fig. 5F]. At protein level the residual expression ranged from 0.20X (IST-Mes2,  $P=0.002$ ) to 0.90X (Mero-25, not significant) as compared to that measured following siCTRL treatment [Fig. 5D-E]. Cellular growth of all MPM cell lines was clearly affected after *RAN* silencing and this impairment was appreciable starting from four days after the treatment. At day 8, as compared to siCTRL, the proliferation rate dropped by an average of 19.3% NCI-H28 ( $P=0.012$ ), of 50% in Mero-14 and IST-Mes2 ( $P<0.001$ , for both cell lines), and of 71.6% in Mero-25 ( $P<0.001$ ). MeT-5A showed only a slight reduction, statistically not significant [Fig. 6]. As illustrated in Fig. 7, *RAN* depletion strongly impaired the capability of colony formation of all MPM cell lines, with Mero-14 being the most affected (-98%,  $P=0.0065$ ), but not of MeT-5A [Fig. 7]. Gene silencing caused an increase of the activity of caspases 3 and 7 in all MPM cell lines, ranging from 1.2-fold (Mero-14,  $P<0.001$ ) to about 2-fold (IST-Mes2,  $P=0.032$ ) [Fig. 8]. Lack of effects was recorded for MeT-5A cells [Fig. 8]. The migration capacity of MPM cells was unaffected, whereas MeT-5A was the only cell line to show a reduced activity after gene silencing (-65%,  $P=0.086$ ) [Fig. S18].

### ***THBS2* Screening**

The protein THBS2 showed to be expressed at various extents in three MPM cell lines: Mero-14, Mero-25, and, weakly, in IST-Mes2 [Fig. S19]. The relative intensities were about 3.2-fold ( $P<0.05$ ), 2.2-fold ( $P=0.08$ ) and 1.3-fold ( $P=0.092$ ) higher than that of MeT-5A, respectively. The mRNA analysis showed a weak expression in MeT-5A and in NCI-H28 and confirmed a high relative expression in Mero-14 (48.5-fold,  $P=0.0036$ ), Mero-25 (4.6-fold,  $P=0.11$ ), and IST-Mes2 (11-fold,  $P<0.001$ ) [Fig. S19]. Thus, *THBS2* was silenced in MeT-5A and in Mero-14, Mero-25, and IST-Mes2. The siRNA, now on called siTHBS2-1, worked at various extents, with a residual mRNA expression ranging from 0.1X (Mero-14,  $P<0.001$ ) to 0.58X (MeT-5A,  $P=0.047$ ) as compared to siCTRL [Fig. S20]. However, at protein level, the depletion of THBS2 occurred only in Mero-14 and IST-Mes2 and we did not proceed further with the phenotypic screening on Mero-25 [Fig. S20]. The

proliferation rate was affected only in IST-Mes2, and 8 days following siTHBS2 treatment we recorded a statistically significant decrease of about 63.6% ( $P=0.044$ ) versus siCTRL treatment [Fig. S21]. Mero-14 and MeT-5A did not show any significant difference. The clonogenic ability was clearly impaired [Fig. S22]. Following *THBS2* silencing, we detected a significant drop in colony number of 70% ( $P=0.002$ ). No changes in clonogenic ability of non-malignant Met5A and Mero-14 cell lines were observed [Fig. S22]. The depletion of *THBS2* induced an increase of caspase 3/7 activity in MeT-5A and Mero-14 of about 15% and 30% respectively, compared to the control (not statistically significant) [Fig. S23]. In IST-Mes2 cells we did not observe any significant change in caspases activities. The wound healing assay did not show significant differences between cells treated with siCTRL or siTHBS2-1 [Data not shown for brevity].
