# Supplementary material for: EIF4G1 and RAN as Possible Drivers for Malignant Pleural Mesothelioma
Source: MDPI journal article supplement (doi:10.3390/ijms21144856), 2020-07-09
Supplement: s1 [file s1]

**EIF4G1 and RAN as Possible Drivers for Malignant Pleural Mesothelioma**

**Irene Dell’Anno**<sup>1, †</sup>, Marcella Barbarino<sup>2,3,†</sup>, Elisa Barone<sup>1,†</sup>, Antonio Giordano<sup>2,3</sup>, Luca Luzzi<sup>4</sup>, Maria Bottaro<sup>2</sup>, Loredana Migliore<sup>1</sup>, Silvia Agostini<sup>1</sup>, Alessandra Melani<sup>1</sup>, Ombretta Melaiu<sup>1,5</sup>, Calogerina Catalano<sup>1,6</sup>, Monica Cipollini<sup>1</sup>, Roberto Silvestri<sup>1</sup>, Alda Corrado<sup>1,7</sup>, Federica Gemignani<sup>1,‡</sup> and Stefano Landi<sup>1,\* ,‡</sup>

<sup>1</sup> Department of Biology, Genetic Unit, University of Pisa, 56126 Pisa, Italy; [irene.dellanno@biologia.unipi.it](mailto:irene.dellanno@biologia.unipi.it) (I.D.); [elisa\\_barone@ymail.com](mailto:elisa_barone@ymail.com) (E.B.); [loredana.migliore@student.unisi.it](mailto:loredana.migliore@student.unisi.it) (L.M.); [silvietta.agostini@gmail.com](mailto:silvietta.agostini@gmail.com) (S.A.); [alessandra-29@hotmail.it](mailto:alessandra-29@hotmail.it) (A.M.); [ombretta.melaiu@unipi.it](mailto:ombretta.melaiu@unipi.it) (O.M.); [cal.catalano@gmail.com](mailto:cal.catalano@gmail.com) (C.C.); [monica.cipollini@unipi.it](mailto:monica.cipollini@unipi.it) (M.C.); [r.silvestri17@gmail.com](mailto:r.silvestri17@gmail.com) (R.S.); [corradoalda@gmail.com](mailto:corradoalda@gmail.com) (A.C.); [federica.gemignani@unipi.it](mailto:federica.gemignani@unipi.it) (F.G.)

<sup>2</sup> Department of Medical Biotechnologies, University of Siena, 53100 Siena, Italy; [marcella.barbarino@unisi.it](mailto:marcella.barbarino@unisi.it) (Marcella Barbarino); [president@shro.org](mailto:president@shro.org) (A.G.); [mariaeusebia.bottaro@gmail.com](mailto:mariaeusebia.bottaro@gmail.com) (Maria Bottaro)

<sup>3</sup> Sbarro Institute for Cancer Research and Molecular Medicine, Center for Biotechnology, College of Science and Technology, Temple University, Philadelphia, PA 19122, USA.

<sup>4</sup> Department of Medicine, Surgery and Neurosciences, Siena University Hospital, 53100 Siena, Italy; [dr.luca.luzzi@gmail.com](mailto:dr.luca.luzzi@gmail.com)

<sup>5</sup> Immuno-Oncology Laboratory, Department of Paediatric Haematology/Oncology and of Cell and Gene Therapy, Ospedale Pediatrico Bambino Gesù, IRCCS, 00165 Rome, Italy.

<sup>6</sup> Department of Internal Medicine V, University of Heidelberg, 69117 Heidelberg, Germany.

<sup>7</sup> Department of Bioscience, University of Milan, 20133 Milan, Italy.

\* Correspondence: [stefano.landi@unipi.it](mailto:stefano.landi@unipi.it)

† The authors contributed equally to this work.

‡ The authors contributed equally to this work

GLUT1

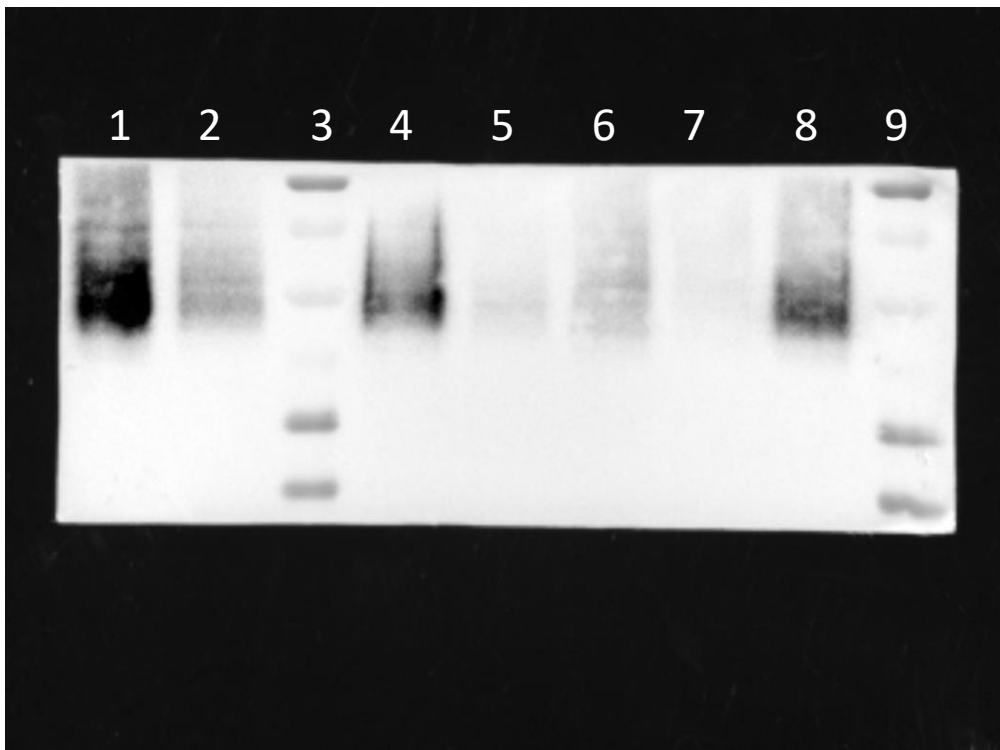

$\beta$ -Actin

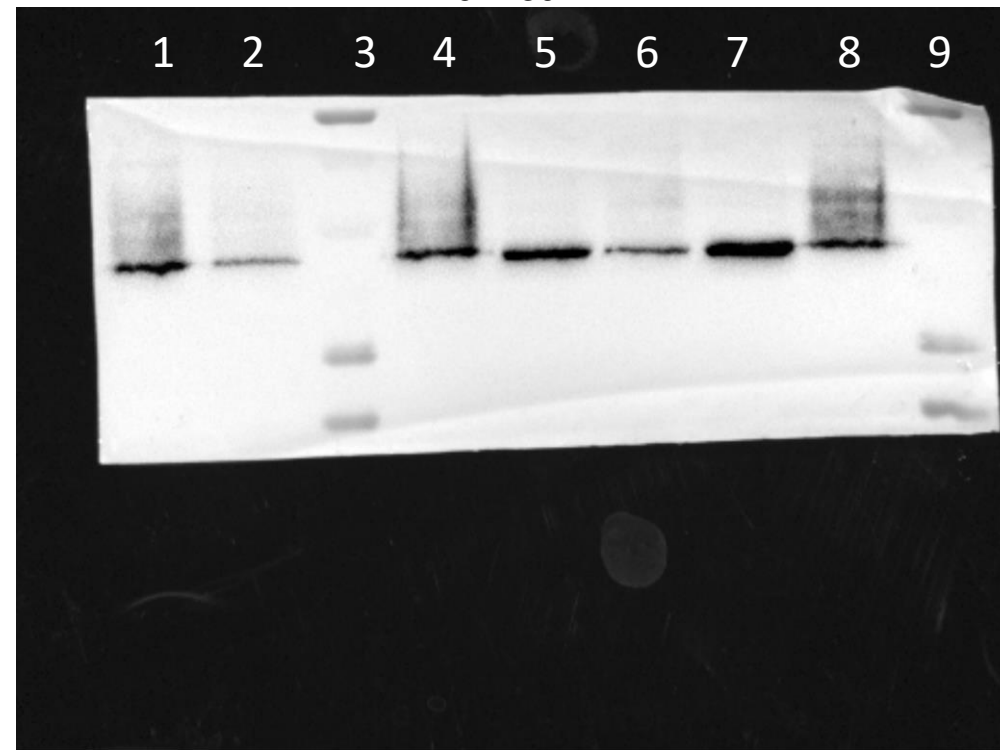

Lane 1: Other sample – TO NOT CONSIDER

Lane 2: Other sample - TO NOT CONSIDER

Lane 3: Ladder

Lane 4: MeT-5A

Lane 5: Mero-14

Lane 6: Mero-25

Lane 7: IST-Mes2

Lane 8: NCI-H28

Lane 9: Ladder

SOD1

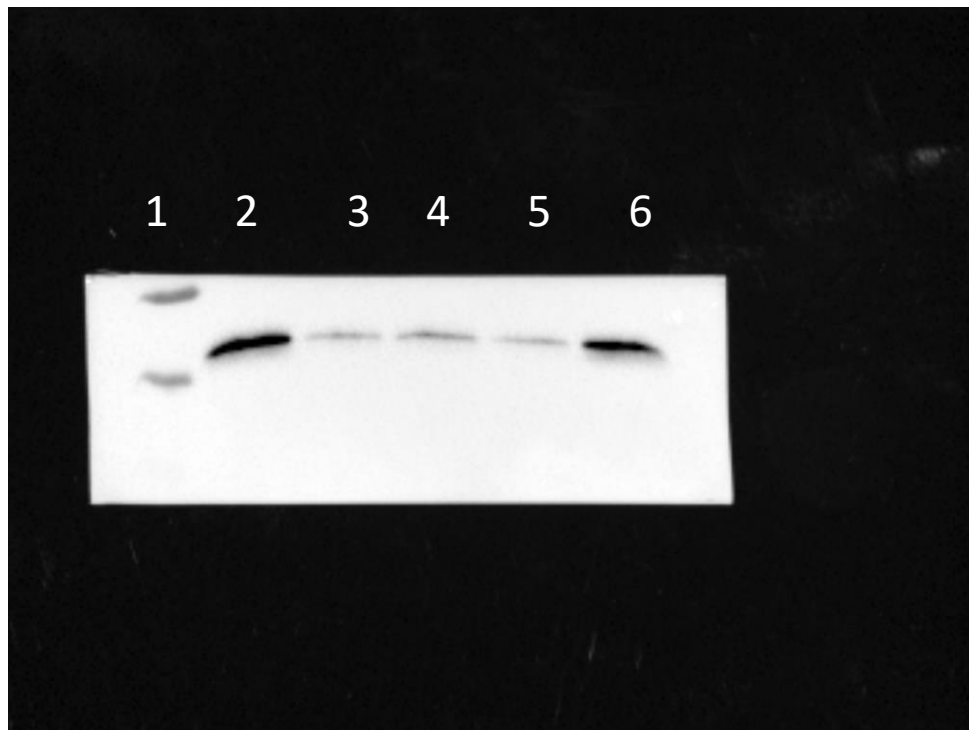

$\beta$ -Actin

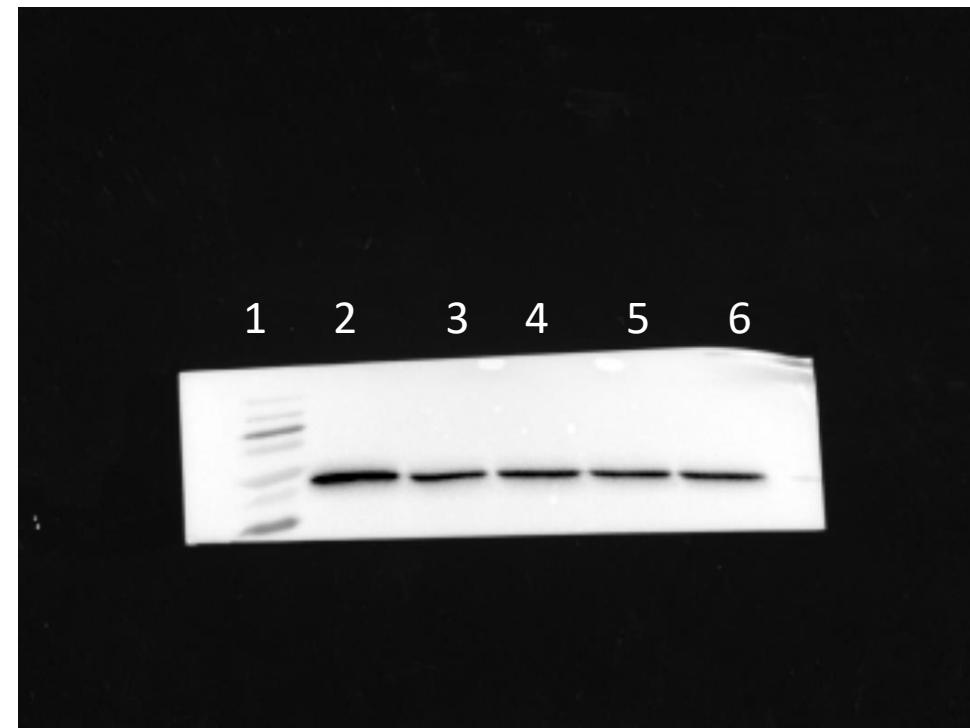

Lane 1:Ladder  
Lane 2:MeT-5A  
Lane 3:Mero-14  
Lane 4:Mero-25  
Lane 5:IST-Mes2  
Lane 6:NCI-H28

ITGA4

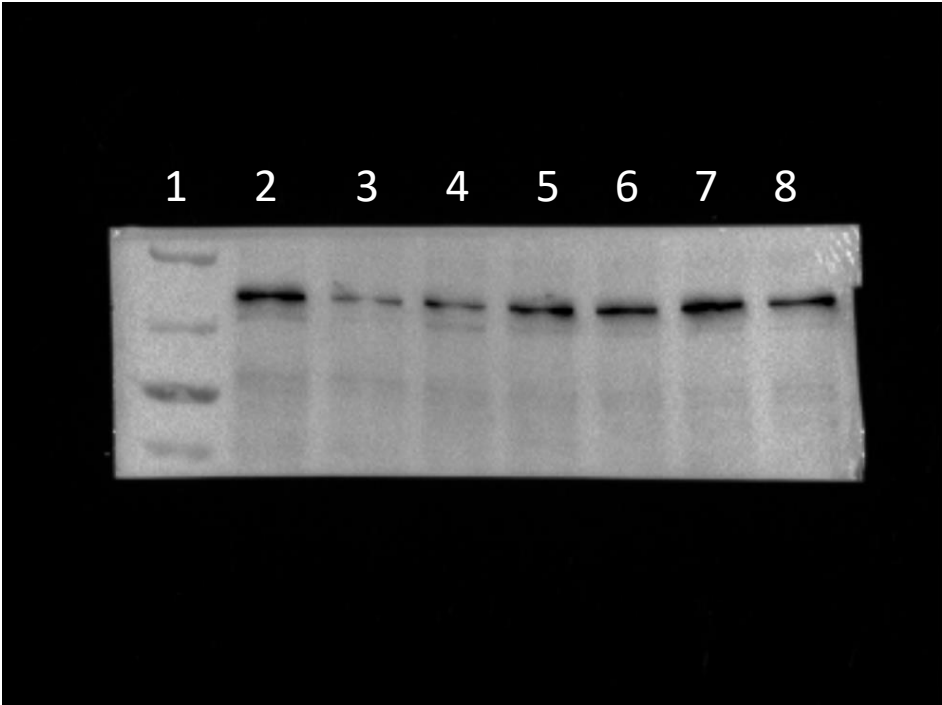

$\beta$ -Actin

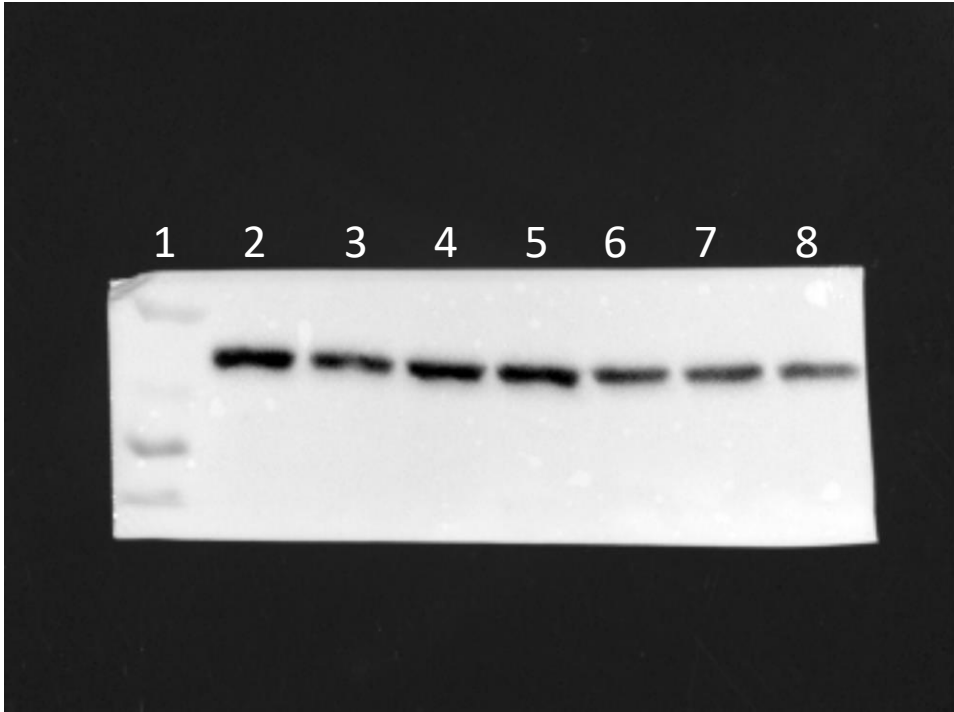

Lane 1:Ladder  
Lane 2:MeT-5A  
Lane 3:Mero-14  
Lane 4:Mero-25  
Lane 5:IST-Mes2  
Lane 6:NCI-H28  
Lane 7: Other sample - TO NOT CONSIDER  
Lane 8: Other sample - TO NOT CONSIDER

ASS1

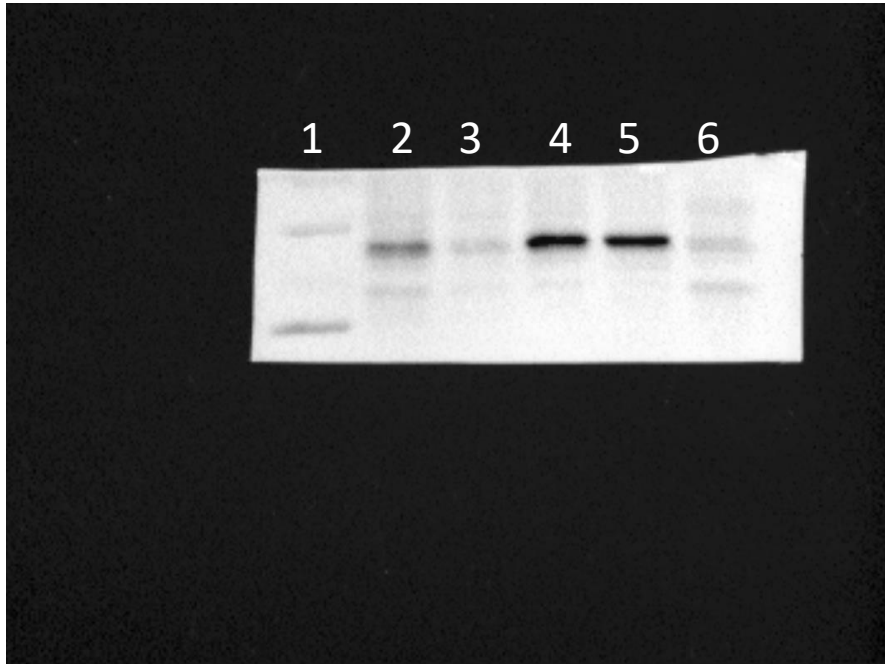

Lane 1:Ladder  
Lane 2:MeT-5A  
Lane 3:Mero-14  
Lane 4:Mero-25  
Lane 5:IST-Mes2  
Lane 6:NCI-H28

 $\beta$ -Actin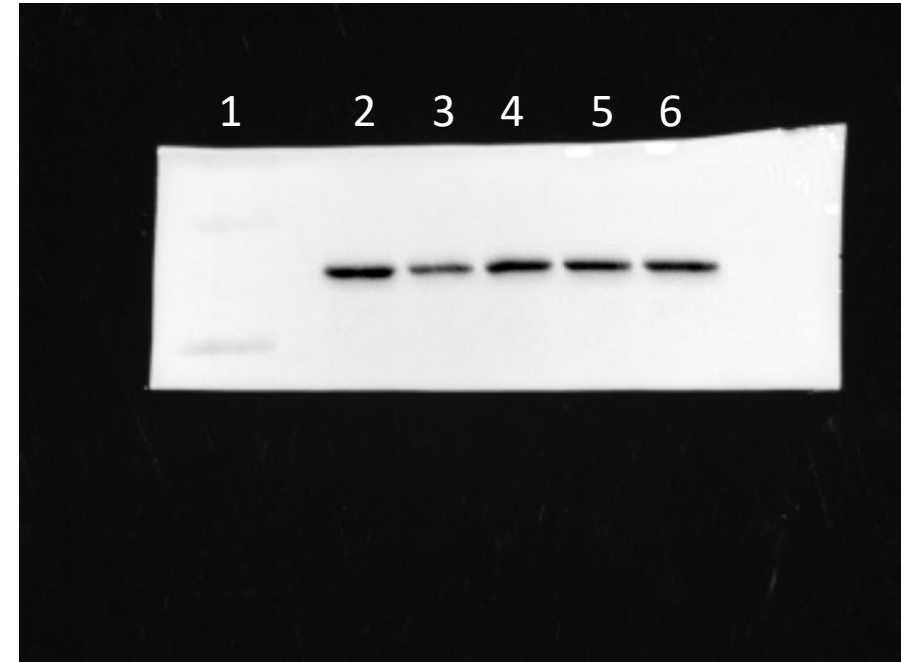

ASS1

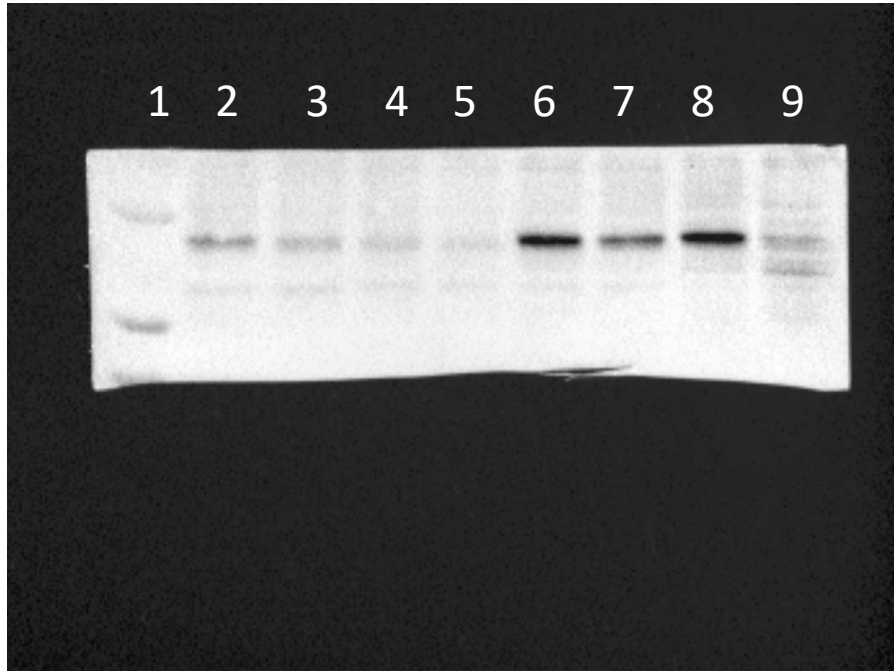

$\beta$ -Actin

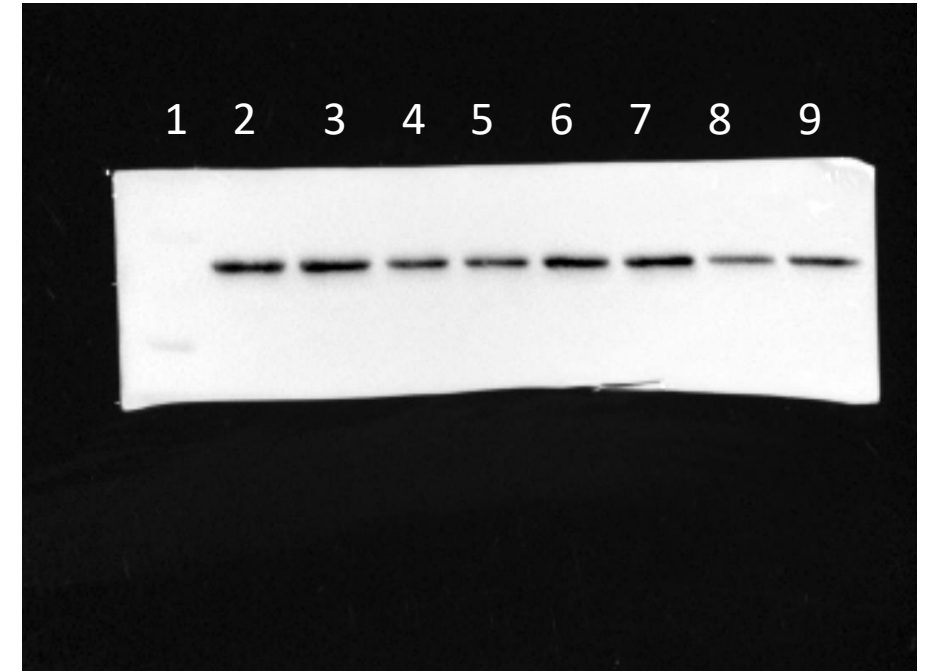

Fig. S5

Lane 1:Ladder

Lane 2: MeT-5A siCTRL

Lane 3: MeT-5A siASS1

Lane 4: Other sample - TO NOT CONSIDER

Lane 5: Other sample - TO NOT CONSIDER

Lane 6: Mero-25 siCTRL

Lane 7: Mero-25 siASS1

Lane 8: IST-Mes2 siCTRL

Lane 9: IST-Mes2 siASS1

EIF4G1

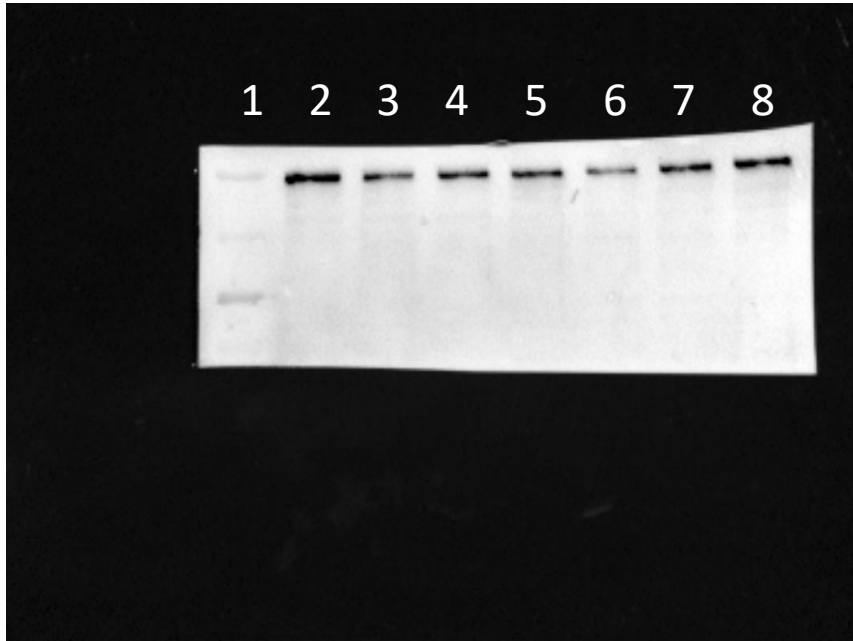 $\beta$ -Actin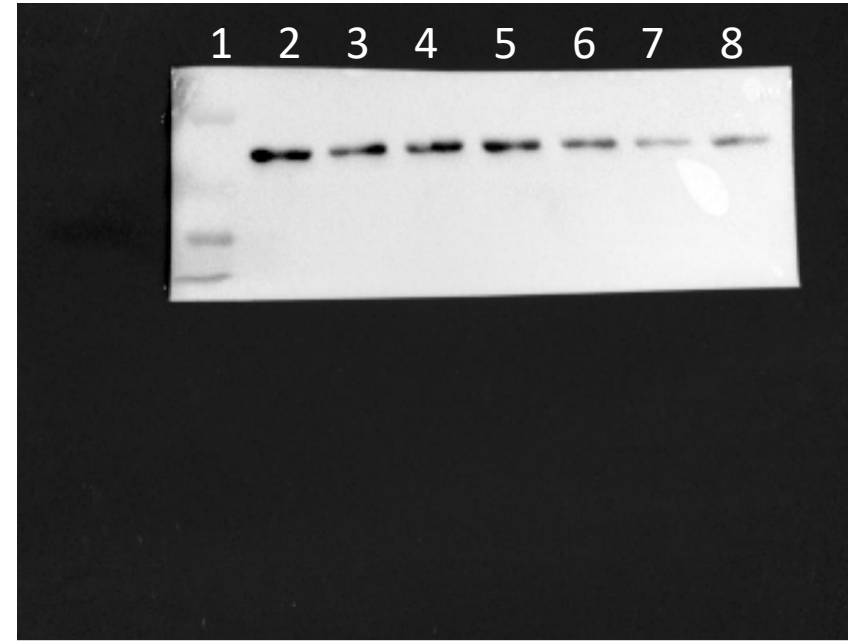

Lane 1:Ladder

Lane 2: MeT-5A

Lane 3: Mero-14

Lane 4: Mero-25

Lane 5: IST-Mes2

Lane 6: NCI-H28

Lane 7: Other sample - TO NOT CONSIDER

Lane 8:Other sample - TO NOT CONSIDER

EIF4G1

 $\beta$ -Actin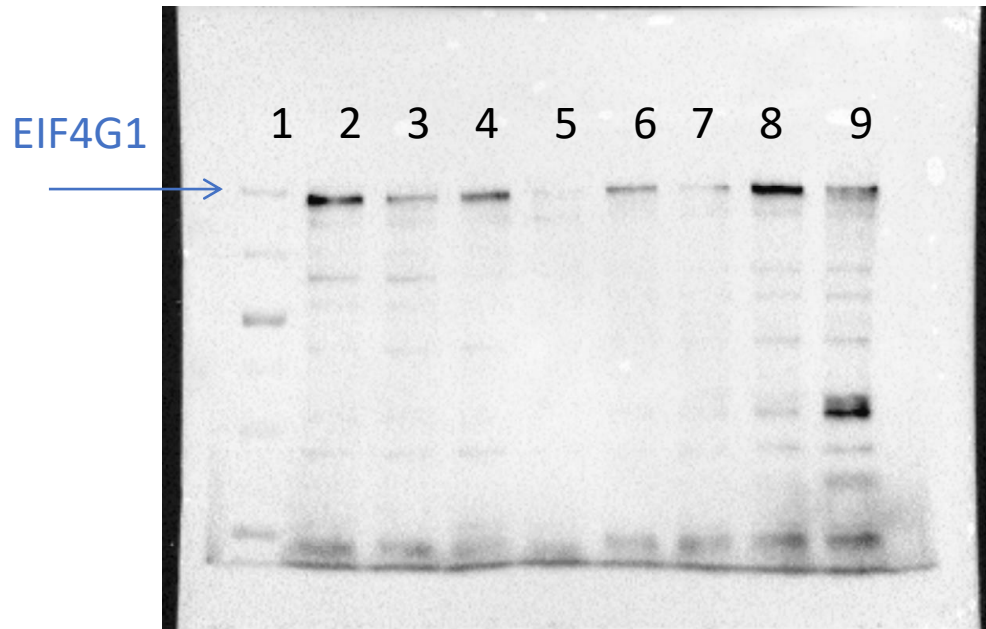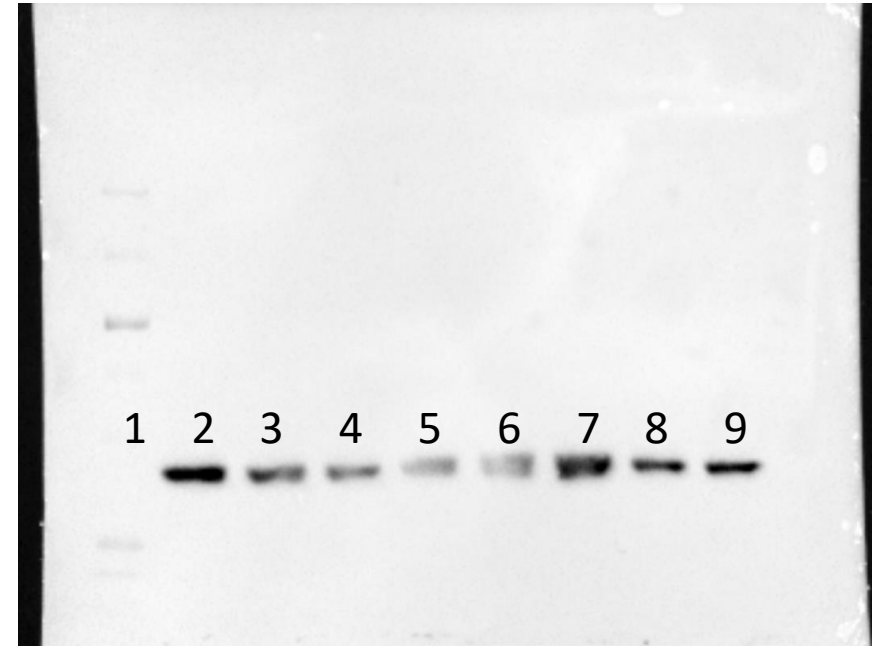

Lane 1:Ladder

Lane 2: Mero-14 siCTRL

Lane 3: Mero-14 siEIF4G1

Lane 4: MeT-5A siCTRL

Lane 5: MeT-5A siEIF4G1

Lane 6: Other sample - TO NOT CONSIDER

Lane 7: Other sample - TO NOT CONSIDER

Lane 8: IST-Mes2 siCTRL

Lane 9: IST-Mes2 siEIF4G1



GALNT7

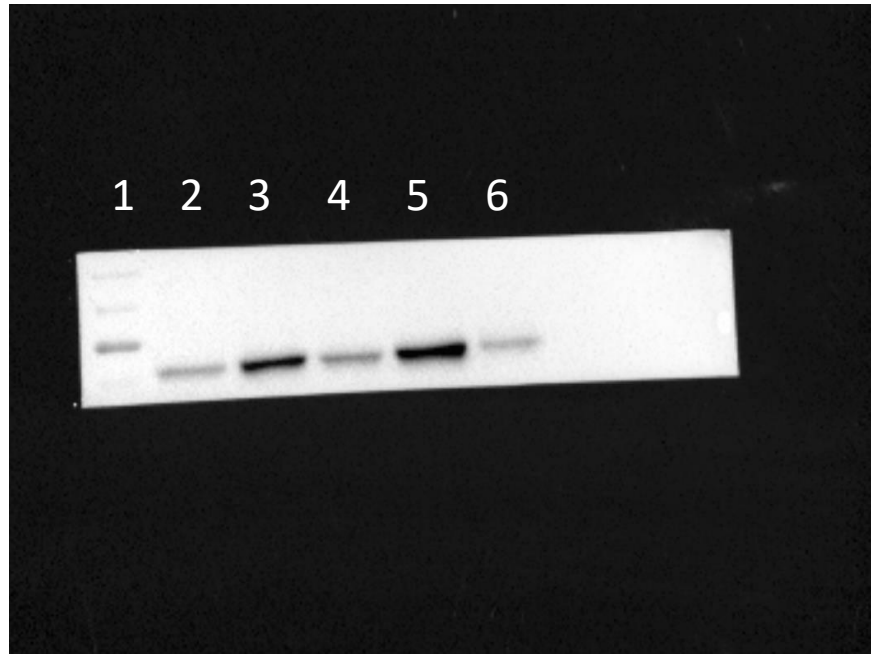 $\beta$ -Actin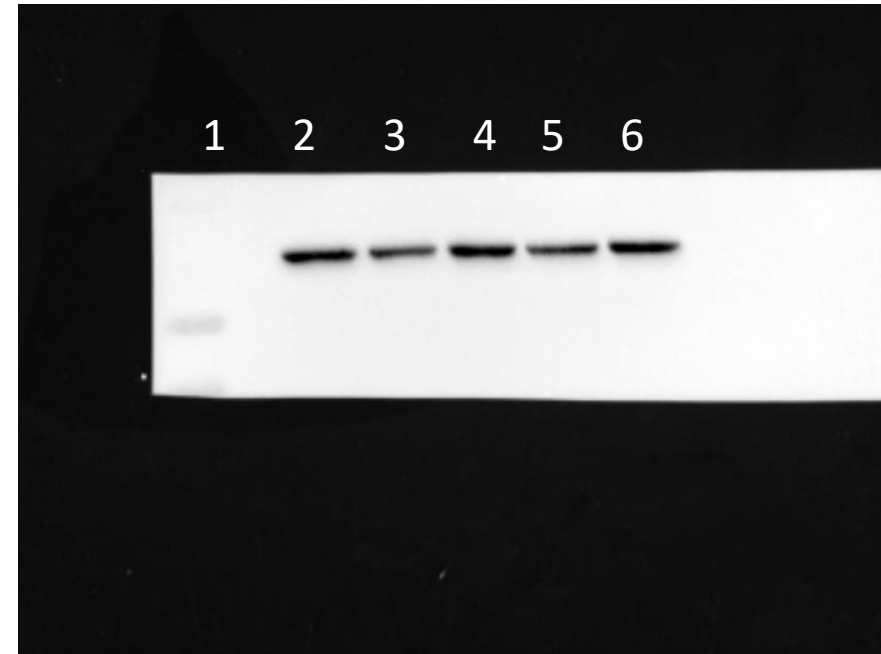

Lane 1: Ladder  
Lane 2: MeT-5A  
Lane 3: Mero-14  
Lane 4: Mero-25  
Lane 5: IST-Mes2  
Lane 6: NCI-H28

GALNT7

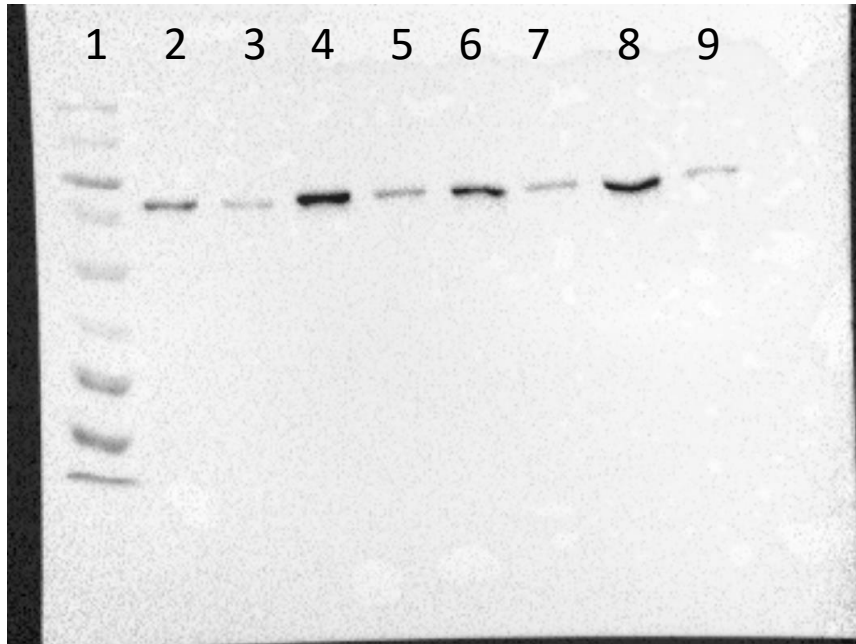 $\beta$ -Actin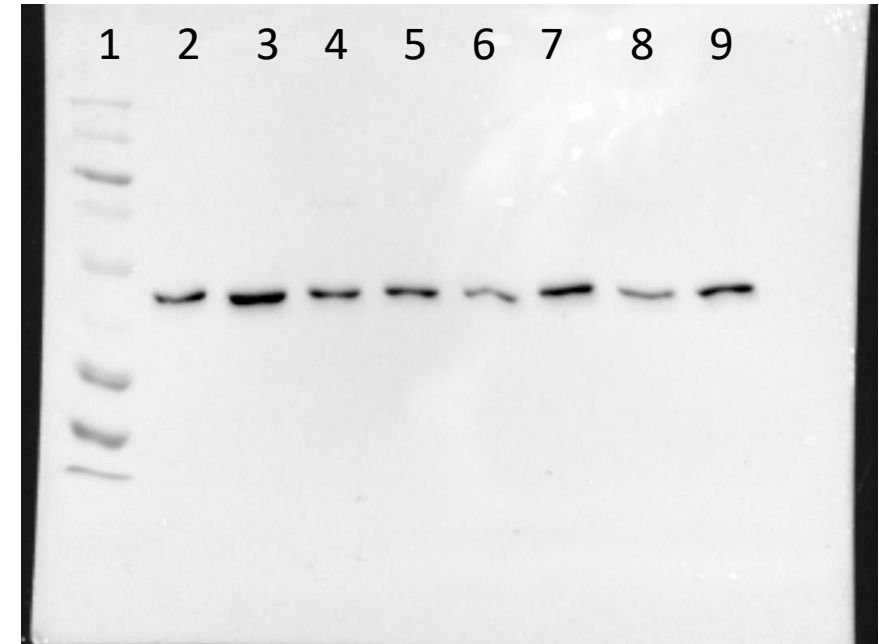

Lane 1:Ladder

Lane 2: MeT-5A siCTRL

Lane 3: MeT-5A siGALNT7

Lane 4: Mero-14 siCTRL

Lane 5: Mero-14 siGALNT7

Lane 6: Other sample - TO NOT CONSIDER

Lane 7: Other sample - TO NOT CONSIDER

Lane 8: IST-Mes2 siCTRL

Lane 9: IST-Mes2 siGALNT7

IGF2BP3

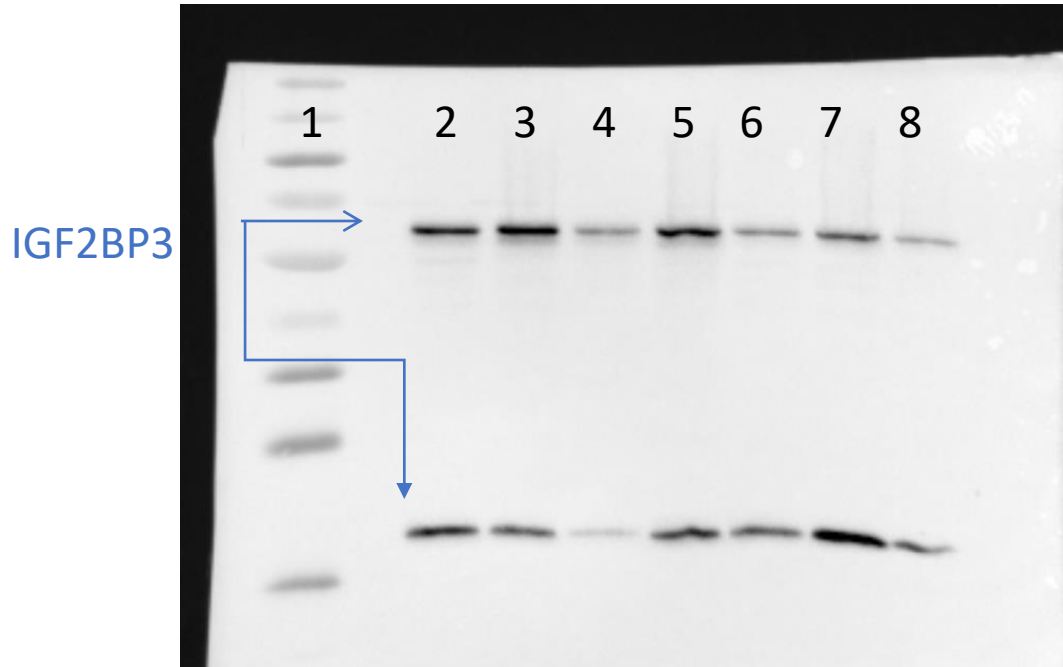 $\beta$ -Actin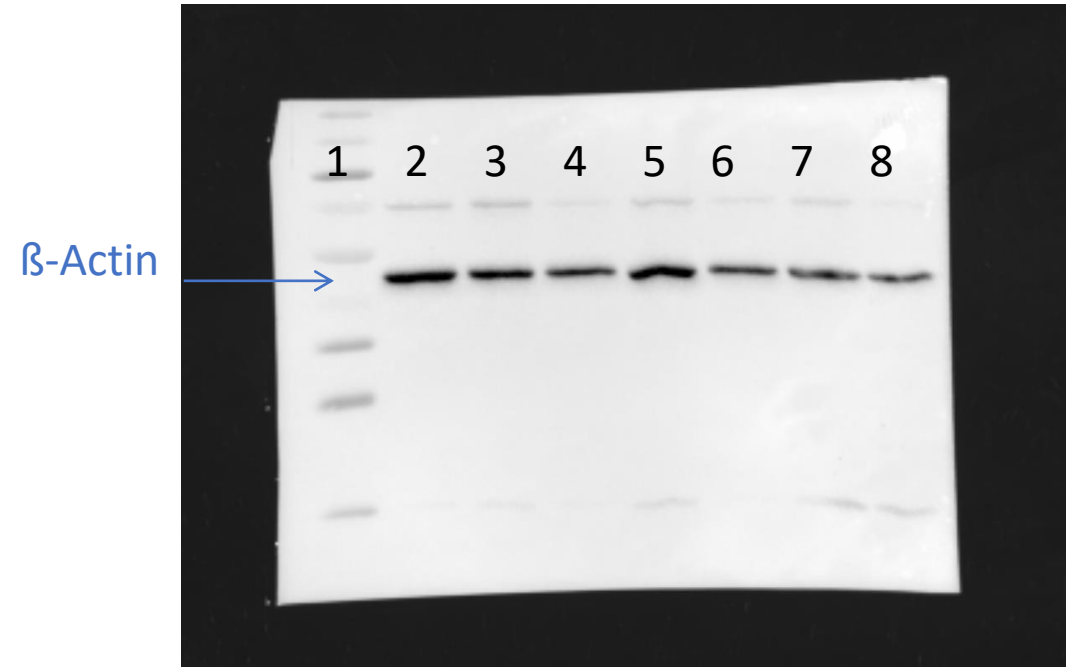

Lane 1:Ladder

Lane 2: MeT-5A

Lane 3: Mero-14

Lane 4: Mero-25

Lane 5: IST-MES2

Lane 6: NCI-H28

Lane 7: Other sample - TO NOT CONSIDER

Lane 8: Other sample - TO NOT CONSIDER

IGF2BP3

 $\beta$ -Actin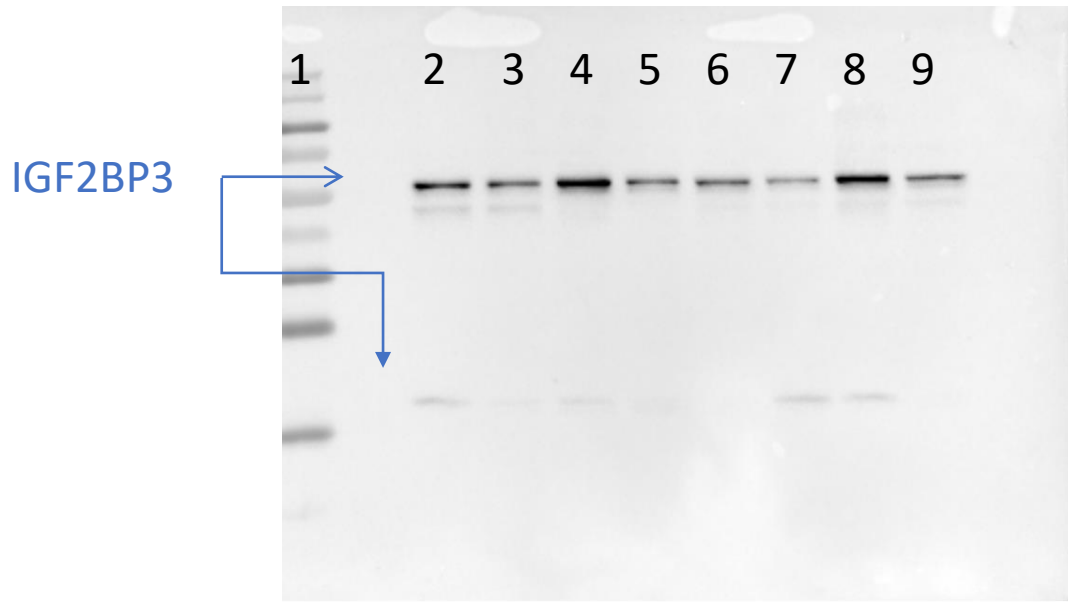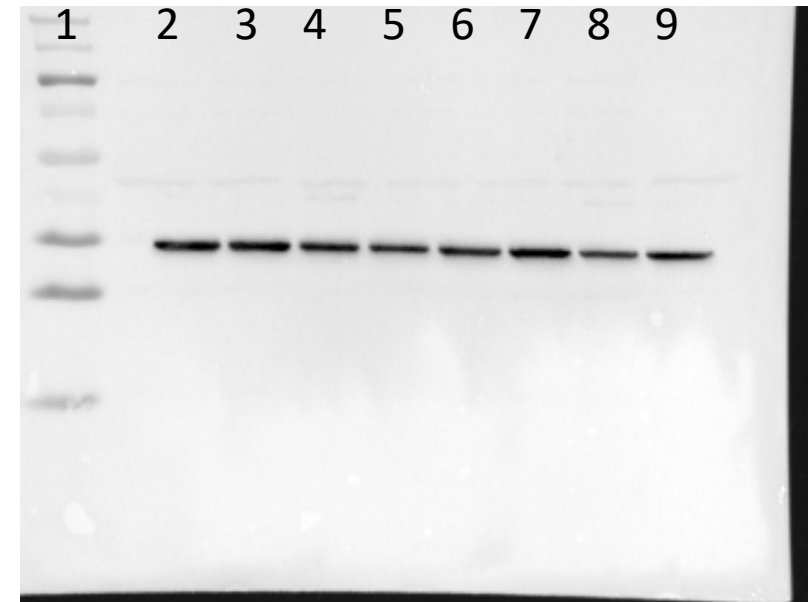

Lane 1:Ladder

Lane 2: MeT-5A siCTRL

Lane 3: MeT-5A siIGF2BP3

Lane 4: Mero-14 siCTRL

Lane 5: Mero-14 siIGF2BP3

Lane 6: IST-Mes2 siCTRL

Lane 7: IST-Mes2 siIGF2BP3

Lane 8: Other sample - TO NOT CONSIDER

Lane 9: Other sample - TO NOT CONSIDER

RAN

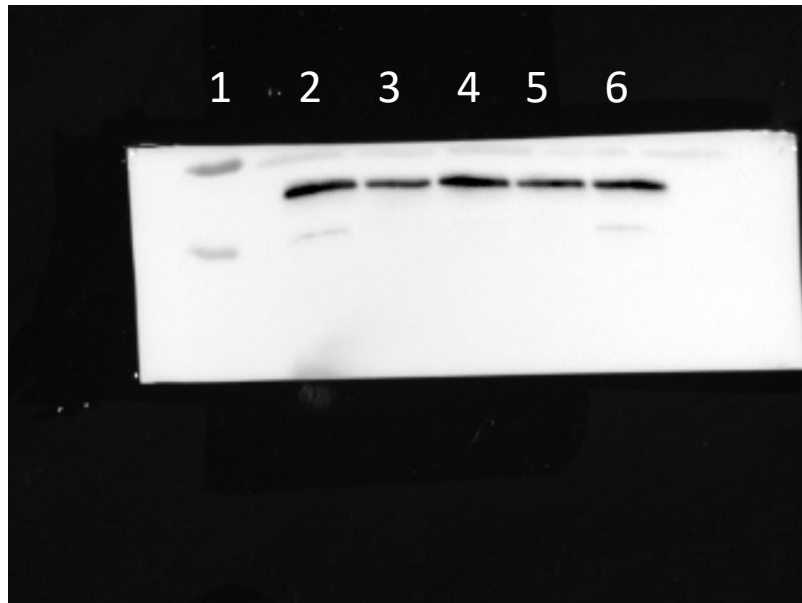 $\beta$ -Actin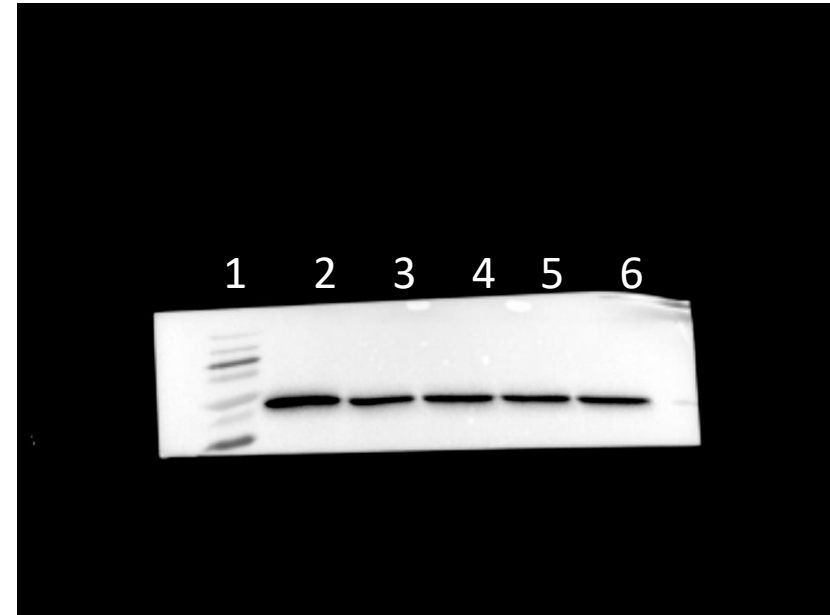

Lane 1:Ladder  
Lane 2: MeT-5A  
Lane 3:Mero-14  
Lane 4:Mero-25  
Lane 5:IST-Mes2  
Lane 6: NCI-H28

Fig. 5D

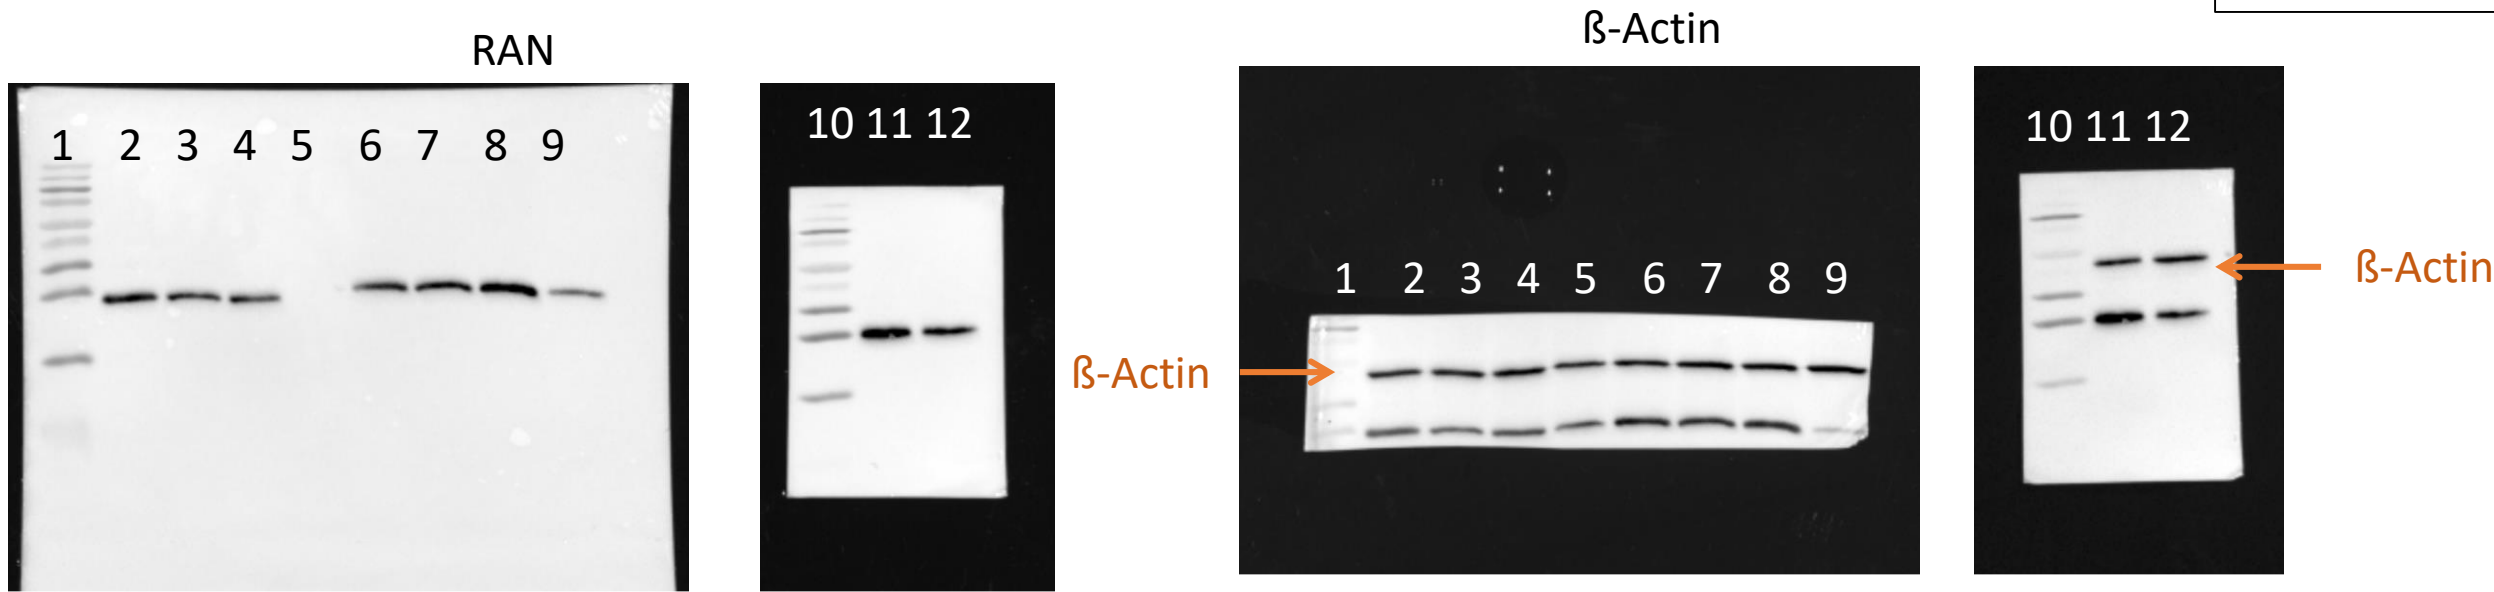

Lane 1:Ladder  
Lane 2: MeT-5A siCTRL  
Lane 3: MeT-5A siRAN  
Lane 4: Mero-14 siCTRL  
Lane 5: Mero-14 siRAN  
Lane 6: Mero-25 siCTRL  
Lane 7: Mero-25 siRAN  
Lane 8:IST-Mes2 siCTRL  
Lane 9:IST-Mes2 siRAN  
Lane 10: Ladder  
Lane 11: NCI-H28 siCTRL  
Lane 12: NCI-H28 siRAN

THBS2

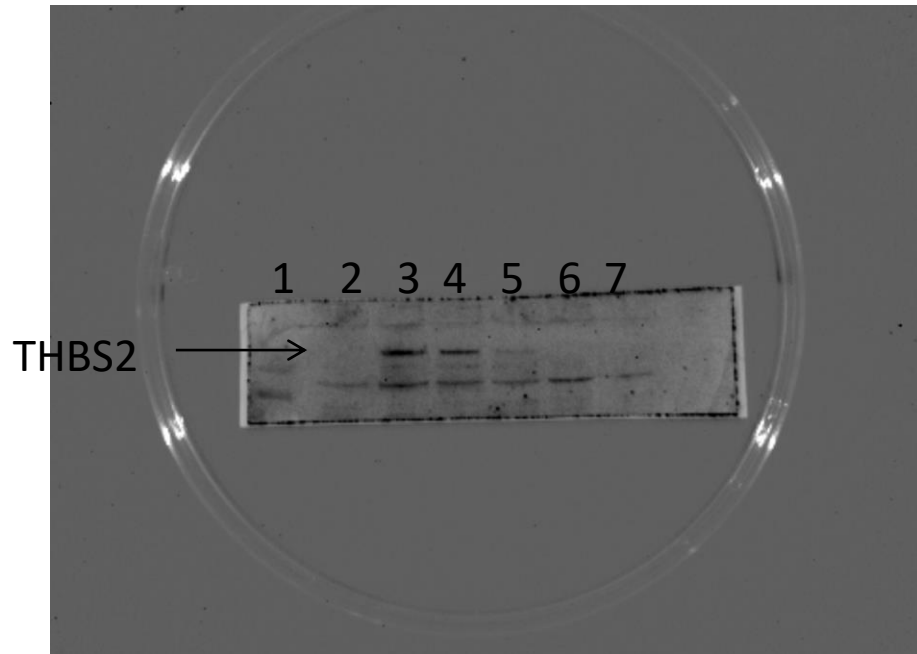 $\beta$ -Actin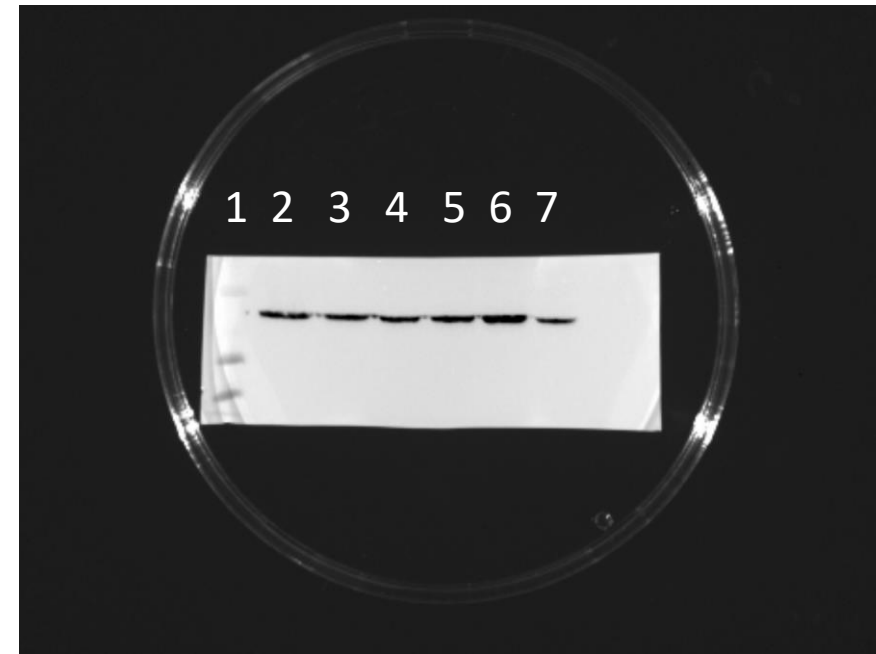

Lane 1:Ladder

Lane 2: MeT-5A

Lane 3:Mero-14

Lane 4:Mero-25

Lane 5:IST-Mes2

Lane 6: NCI-H28

Lane 7: Other sample – TO NOT CONSIDER

THBS2

 $\beta$ -Actin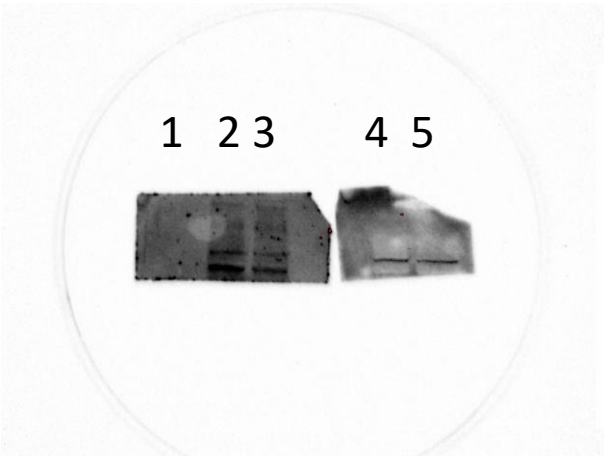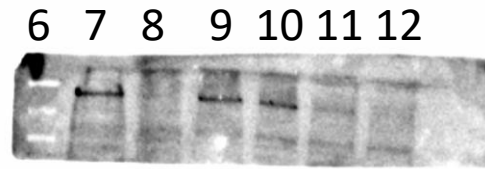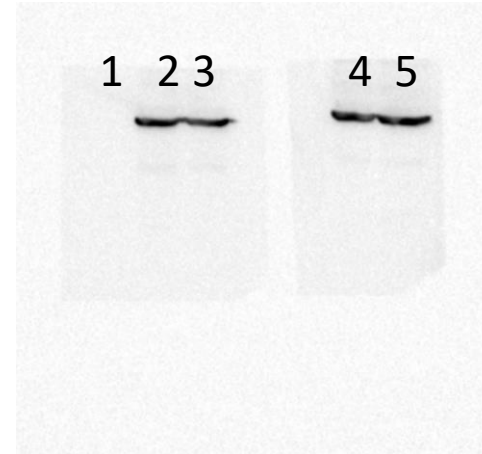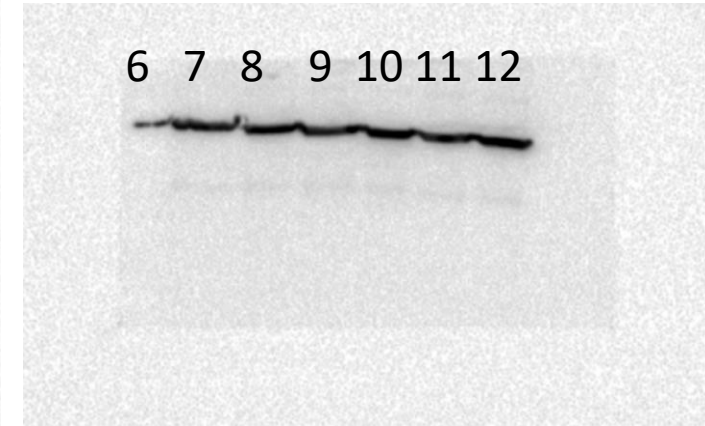

Lane 1:Ladder

Lane 2: Other sample – TO NOT CONSIDER

Lane 3: Other sample – TO NOT CONSIDER

Lane 4: MeT-5A siCTRL

Lane 5: MeT-5A si THBS2

Lane 6: Ladder

Lane 7:Mero-14 siCTRL

Lane 8:Mero-14 siTHBS2

Lane 9:Mero-25 siCTRL

Lane 10: Mero-25 siTHBS2

Lane 11: IST-Mes2 siCTRL

Lane 12:IST-Mes2 siTHBS2
