# Supplementary material for: EIF4G1 and RAN as Possible Drivers for Malignant Pleural Mesothelioma
Source: Int J Mol Sci. 2020 Jul 9;21(14):4856. doi: 10.3390/ijms21144856 (PMC7402288; doi:10.3390/ijms21144856)
Supplement: Supplementary file 1 [file ijms-21-04856-s001.zip]

Archive with 6 entries (5 files):
- ijms-820510 final supplementary/
- ijms-820510 final supplementary/Appendix A.pdf
- ijms-820510 final supplementary/Appendix B.pdf
- ijms-820510 final supplementary/ijms-820510 Supplementary Figuress.pdf
- ijms-820510 final supplementary/Original Images_Blots.pdf
- ijms-820510 final supplementary/Supplementary Table 1.pdf
